# Supplementary material
Source: publisher figshare collection journal article supplement (https://acs.figshare.com/ndownloader/files/4668817)
Supplement: Supplementary file 1 [file 4668817]

## **Supporting Information**

### **‘Schizophrenic’ Micellization Associated with Coil-to-Helix Transitions Based on Polypeptide Hybrid Double Hydrophilic Rod-Coil Diblock Copolymer**

**Jingyi Rao, Zhaofeng Luo, Zhishen Ge, Hao Liu, and Shiyong Liu\***

*Department of Polymer Science and Engineering, School of Life Science, Hefei  
National Laboratory for Physical Sciences at the Microscale, University of Science  
and Technology of China, Hefei, Anhui 230026, China*

\* To whom correspondence should be addressed. E-mail: sliu@ustc.edu.cn

**Sample Preparation.** *Synthesis of  $\gamma$ -Benzyl-L-Glutamate N-Carboxyanhydride.*

N-Carboxyanhydride of  $\gamma$ -benzyl-L-glutamate (BLG) was prepared according to literature procedures with slight modification.<sup>1,2</sup> Briefly, 50 mL triphosgene/THF solution (0.07 g/mL) was added to the suspension of BLG (7.0 g, 29.5 mmol) in 250 mL of anhydrous THF at 50 °C. After stirring for ~2 h, a clear solution was obtained. The reaction mixture was evaporated to dryness under reduced pressure to remove HCl and residual triphosgene. The resulting dry solids were re-dissolved in 80 mL anhydrous THF and then precipitated into an excess of anhydrous petroleum ether. This purification cycle was repeated for three times, yielding white crystals of BLG-NCA (~92% yield). <sup>1</sup>H NMR in CDCl<sub>3</sub>,  $\delta$  (ppm): 2.10-2.50 (m, 2H, CH<sub>2</sub>), 2.74 (t, 2H, CH<sub>2</sub>), 4.46 (t, 1H, CH), 5.25 (s, 2H, OCH<sub>2</sub>), 6.35 (s, 1H, NH), 7.48 (m, 5H, C<sub>6</sub>H<sub>5</sub>).

*Synthesis of PNIPAM<sub>65</sub>-b-PBLG<sub>110</sub>.*<sup>3,4</sup> Mono-amino-terminated PNIPAM (1 g, 0.14 mmol) was dissolved in ~30 mL anhydrous CH<sub>2</sub>Cl<sub>2</sub> in a 250 mL baked flask. BLG-NCA (4.7 g, 18 mmol) was dissolved in 25 mL anhydrous CH<sub>2</sub>Cl<sub>2</sub> in a separate 100 mL flask. The BLG-NCA/CH<sub>2</sub>Cl<sub>2</sub> mixture was then cannulated into the PNIPAM<sub>65</sub>-NH<sub>2</sub>/CH<sub>2</sub>Cl<sub>2</sub> solution via a double-tipped stainless needle. The reaction mixture was allowed to stir for 3 d at room temperature under dry N<sub>2</sub> atmosphere. After partially removing the solvents, the reaction mixture was precipitated into an excess of anhydrous diethyl ether. This purification cycle was repeated for 3 times. The obtained white solids were dried in a vacuum oven overnight at room temperature. The molecular weight and molecular weight distribution of PNIPAM-*b*-PBLG were determined by GPC using THF as the eluent:  $M_n = 35,100$ ,  $M_w/M_n = 1.29$ . The actual degree of polymerization (DP) of PBLG block was determined to be 110 by <sup>1</sup>H NMR analysis in CDCl<sub>3</sub> (containing ~10 v/v% TFA). The obtained diblock copolymer was denoted as PNIPAM<sub>65</sub>-*b*-PBLG<sub>110</sub>.

*Synthesis of PNIPAM<sub>65</sub>-b-PLGA<sub>110</sub>.* The removal of protecting benzyl groups was carried out as follows. PNIPAM<sub>65</sub>-*b*-PBLG<sub>110</sub> diblock copolymer (1.0 g, 0.03 mmol) was dissolved in 40 mL THF, aqueous NaOH solution (1.0 mL, 25 wt%) was then added. After stirring for 12 h at room temperature, the solvents were removed under reduced pressure. The obtained solids were redispersed in water and the solution pH

was adjusted to 3 with the addition of HCl. The aqueous solution was then dialyzed against deionized water for 12 h using semipermeable membranes with a cutoff molar mass of 3,500 g/mol. The obtained PNIPAM<sub>65</sub>-*b*-PLGA<sub>110</sub> was dried in a vacuum oven overnight at room temperature. The complete removal of benzyl protecting groups was further confirmed by <sup>1</sup>H NMR and FT-IR analysis.

## References

- (1) Wang, L. Y.; Wang, S. G.; Bei, J. Z. *Polym. Adv. Technol.* **2004**, *15*, 617-621.
- (2) Daly, W. H.; Poche, D. *Tetrahedron Lett.* **1988**, *29*, 5859-5862.
- (3) Cheon, J. B.; Jeong, Y. I.; Cho, C. S. *Polymer* **1999**, *40*, 2041-2050.
- (4) Cho, C. S.; Cheon, J. B.; Jeong, Y. I.; Kim, I. S.; Kim, S. H.; Akaike, T. *Macromol. Rapid Commun.* **1997**, *18*, 361-369.

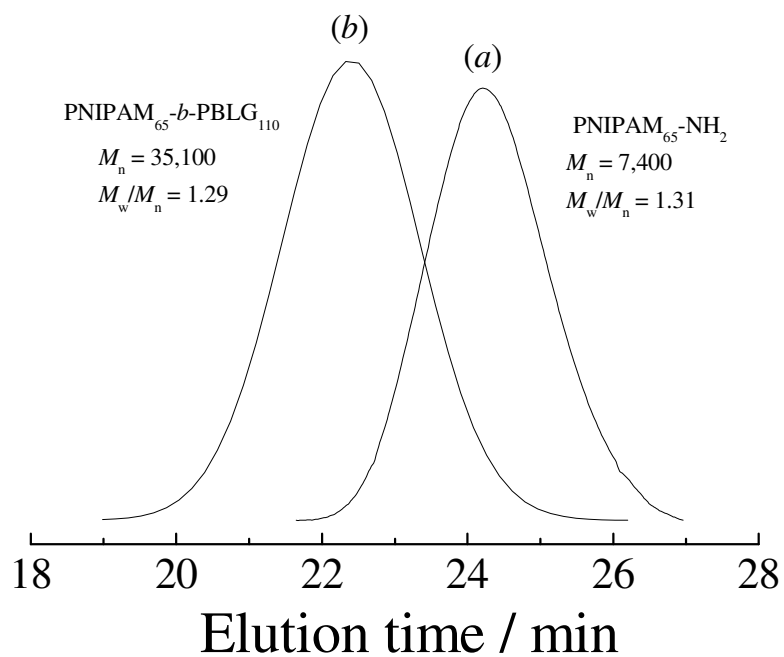

**Figure S1.** GPC traces of mono-amino-terminated PNIPAM precursor and  $\text{PNIPAM}_{65}\text{-}b\text{-PBLG}_{110}$  diblock copolymer.

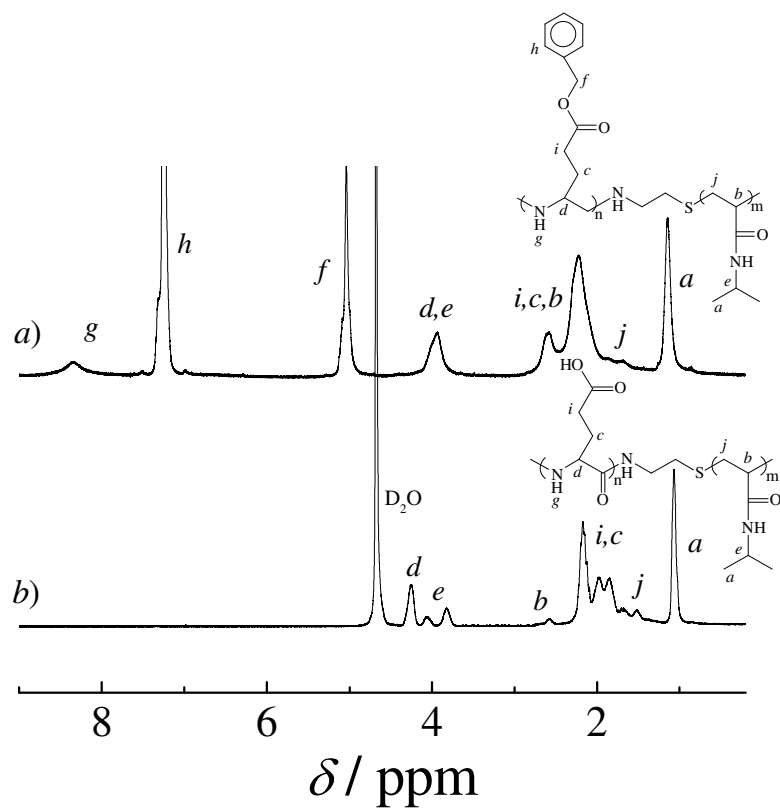

**Figure S2.**  $^1\text{H}$  NMR spectra of (a)  $\text{PNIPAM}_{65}\text{-}b\text{-PBLG}_{110}$  in  $\text{CDCl}_3/\text{TFA}$  mixture, and (b)  $\text{PNIPAM}_{65}\text{-}b\text{-PLGA}_{110}$  in  $\text{D}_2\text{O}$  at pH 10.

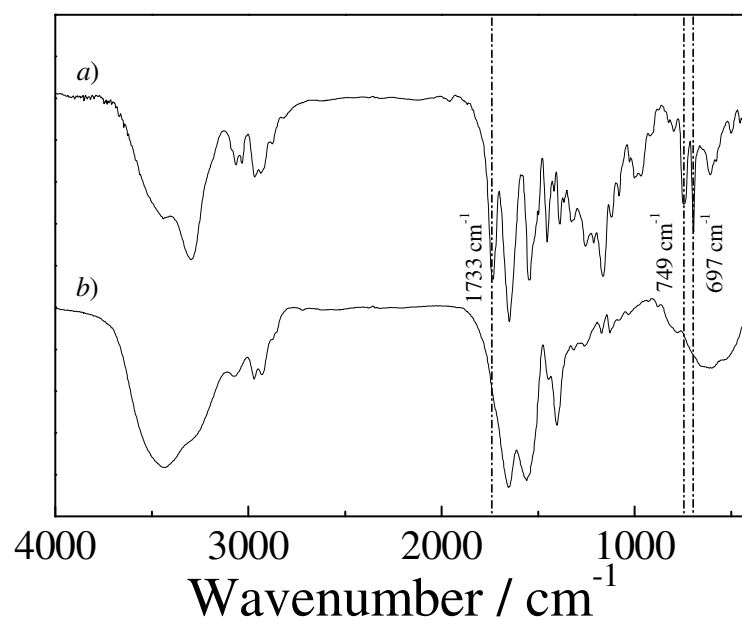

**Figure S3.** FT-IR spectra of (a) PNIPAM<sub>65</sub>-*b*-PBLG<sub>110</sub> and (b) the hydrolyzed product, PNIPAM<sub>65</sub>-*b*-PLGA<sub>110</sub>.

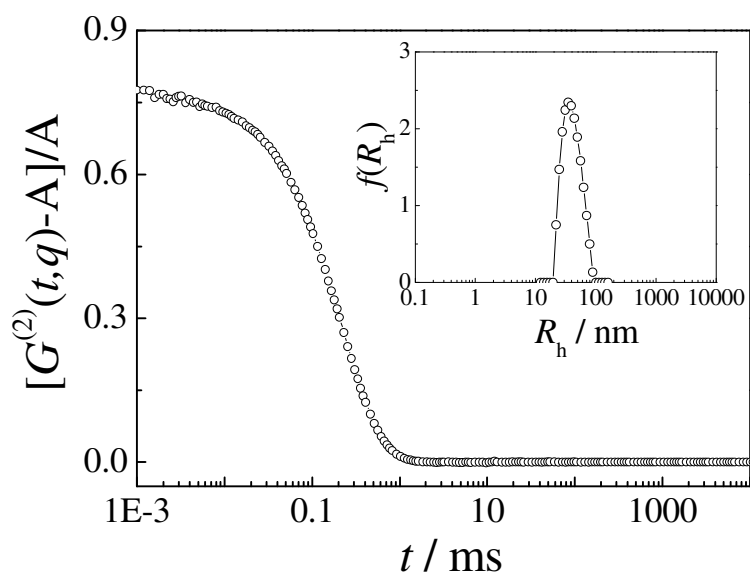

**Figure S4.** Typical intensity-intensity time correlation function  $G^{(2)}(t,q)$  obtained for 1.0 g/L aqueous solution of PNIPAM<sub>65</sub>-*b*-PLGA<sub>110</sub> at pH 10 and 35 °C. The inset shows typical hydrodynamic radius distribution,  $f(R_h)$ .
